# Supplementary material
Source: MDPI journal article supplement (https://www.mdpi.com/2073-4352/9/6/283)
Supplement: s1 [file s1]

# Mechanochemical Access to Elusive Metal Diphosphate Coordination Polymer

Andrea Ienco <sup>1,\*</sup>, Giulia Tuci <sup>1</sup>, Annalisa Guerri <sup>2</sup> and Ferdinando Costantino <sup>3</sup>

<sup>1</sup> Consiglio Nazionale delle Ricerche - Istituto di Chimica dei Composti OrganoMetallici (CNR-ICCOM) Via Madonna del Piano 10, Sesto Fiorentino, Firenze (I-50019), Italy; [andrea.ienco@iccom.cnr.it](mailto:andrea.ienco@iccom.cnr.it); [giulia.tuci@iccom.cnr.it](mailto:giulia.tuci@iccom.cnr.it)

<sup>2</sup> Dipartimento di Chimica "Ugo Schiff", University of Florence, Via della Lastruccia 3, Sesto Fiorentino, Firenze (I-50019), Italy; [annalisa.guerri@unifi.it](mailto:annalisa.guerri@unifi.it)

<sup>3</sup> Dipartimento di Chimica, Biologia e Biotecnologie, University of Perugia, Via Elce di Sotto 8, Perugia, (I-06123) Italy; [ferdinando.costantino@unipg.it](mailto:ferdinando.costantino@unipg.it)

\* Correspondence: [andrea.ienco@iccom.cnr.it](mailto:andrea.ienco@iccom.cnr.it); Tel +39-055-5225-282

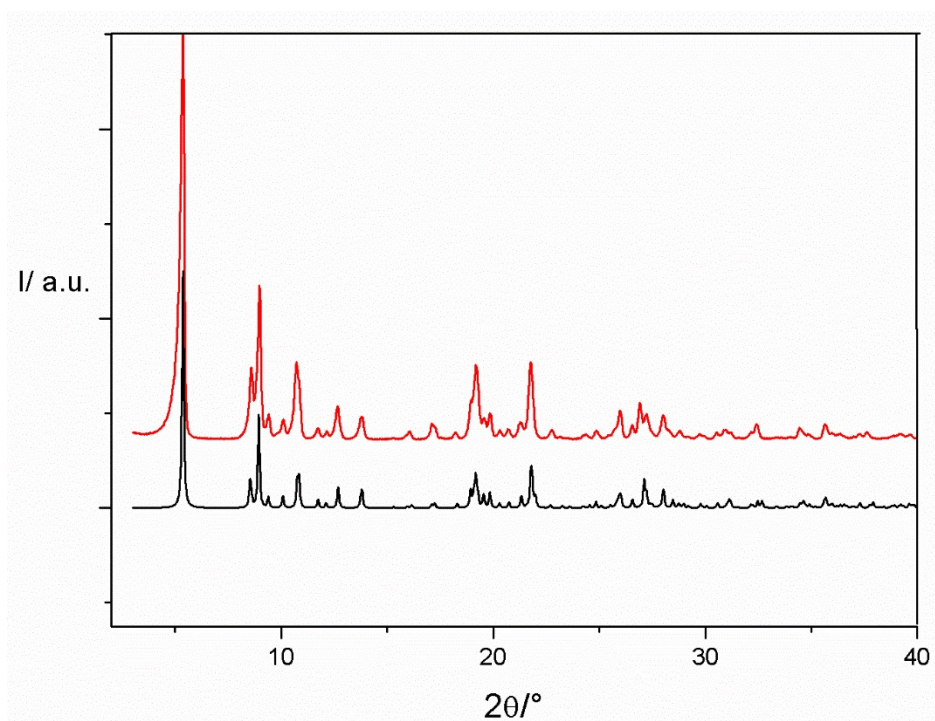

**Figure S1.** Comparison of the calculated (black) and experimental (red) X-ray pattern for 1.

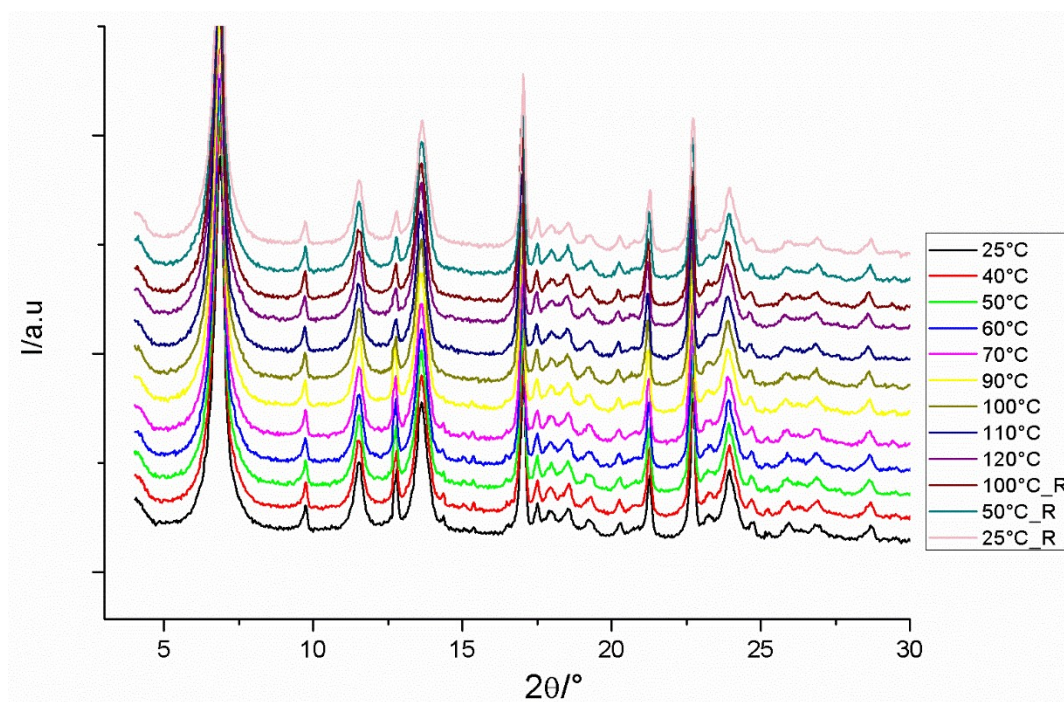

**Figure S2.** Temperature-dependent X-ray powder diffraction patterns for phase 2. The patterns recorded during the cooling are indicated with an R in the legend.
